# Supplementary material
Source: publisher figshare collection journal article supplement (https://sage.figshare.com/ndownloader/files/17282777)

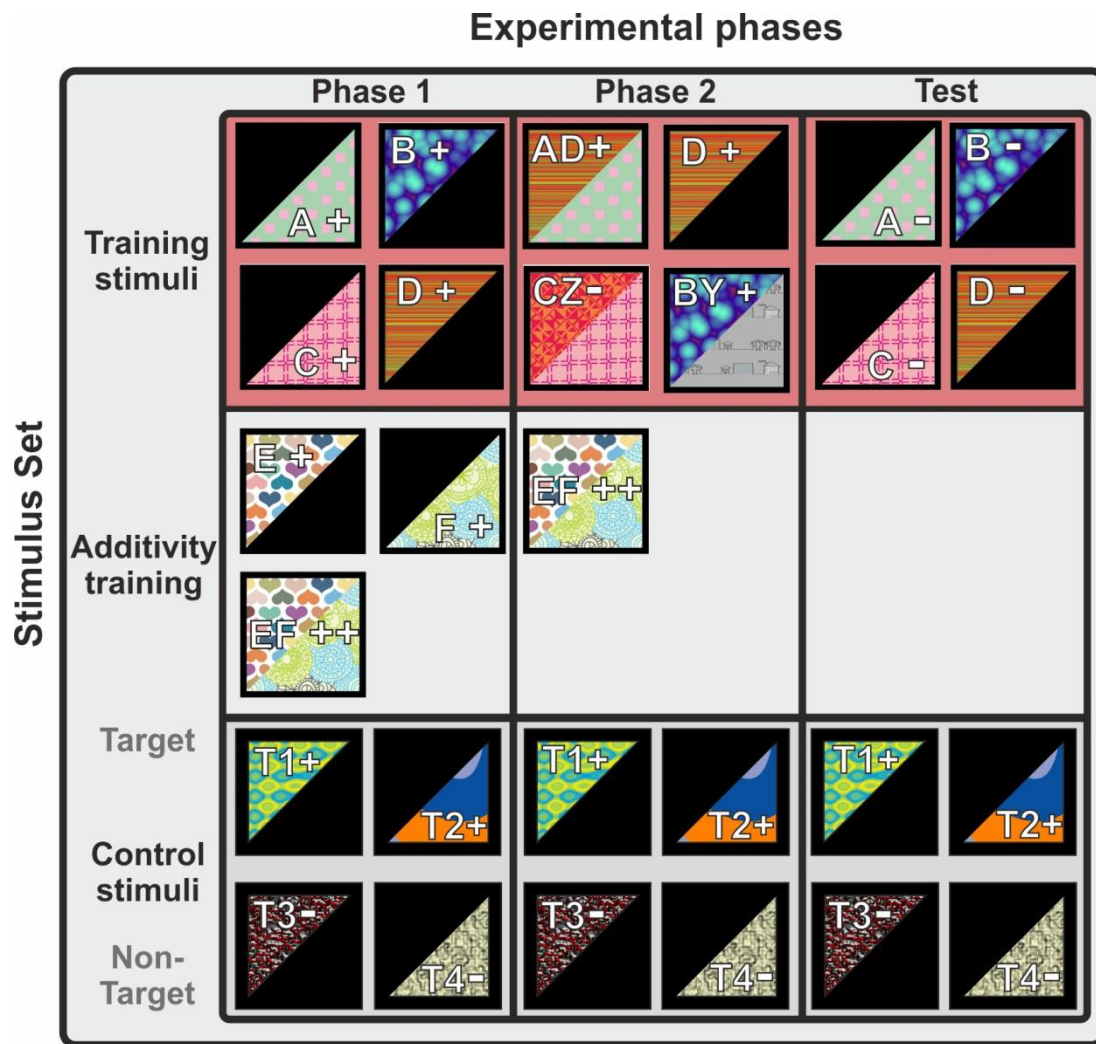

Supplementary figure 3. Stimulus set 1 used for the first set of pigeons in Experiment 2.

Supplement: Supplementary file 1 [file 17282777]
